# Supplementary material for: Reconciling the apparent absence of a Last Glacial Maximum alpine glacial advance, Yukon Territory, Canada, through cosmogenic beryllium-10 and carbon-14 measurements
Source: Copernicus journal article supplement (doi:10.5194/gchron-4-311-2022), 2022-05-25
Supplement: Supplementary file 1 [file gchron-4-311-2022-supplement.zip]

Archive with 3 entries (3 files):
- Grey Hunter Supplement.docx
- GreyHunterSamples.kmz
- gchron-4-311-2022-supplement-title-page.pdf
