# Supplementary material for: Reconciling the apparent absence of a Last Glacial Maximum alpine glacial advance, Yukon Territory, Canada, through cosmogenic beryllium-10 and carbon-14 measurements
Source: Copernicus journal article supplement (doi:10.5194/gchron-4-311-2022), 2022-05-25
Supplement: Supplementary file 1 [file gchron-4-311-2022-supplement.zip › gchron-4-311-2022-supplement-title-page.pdf]

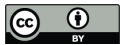

*Supplement of*

**Reconciling the apparent absence of a Last Glacial Maximum alpine glacial advance, Yukon Territory, Canada, through cosmogenic beryllium-10 and carbon-14 measurements**

**Brent M. Goehring et al.**

*Correspondence to:* Brent M. Goehring ([bgoehrin@tulane.edu](mailto:bgoehrin@tulane.edu))

- [gchron-4-311-2022-supplement-title-page.pdf](#)
- [Grey Hunter Supplement.docx](#)
- [GreyHunterSamples.kmz](#)

The copyright of individual parts of the supplement might differ from the article licence.
